# Supplementary material
Source: PubMed Central journal article supplement (PMC10763856)
Supplement: NIHMS1951962-supplement-Online_supplement.pdf [file NIHMS1951962-supplement-Online_supplement.pdf]

## ONLINE SUPPLEMENT

### Association of low FVC spirometric pattern with WTC occupational exposures

Rafael E. de la Hoz<sup>1,2</sup>, Moshe Shapiro<sup>1</sup>, Anna Nolan<sup>3</sup>, Juan C. Celedón<sup>4</sup>, Roberto G. Lucchini<sup>1</sup>

Departments of <sup>1</sup>Environmental Medicine and Public Health, and <sup>2</sup>Medicine, Icahn School of Medicine at Mount Sinai, New York, NY, USA

<sup>3</sup>Department of Medicine, New York University School of Medicine, New York, NY, USA

<sup>4</sup>Division of Pediatric Pulmonary Medicine, Allergy and Immunology, Children's Hospital of Pittsburgh, University of Pittsburgh, Pittsburgh, PA, USA

#### Corresponding author:

Rafael E. de la Hoz, MD, MPH, MSc  
Division of Occupational Medicine  
Icahn School of Medicine at Mount Sinai  
One Gustave L. Levy Place  
WTC HP CCE Box 1059  
New York, NY 10029  
United States of America  
Telephone: (212) 241-7996  
Facsimile: (212)-241-5516  
Email: [Rafael.delaHoz@mssm.edu](mailto:Rafael.delaHoz@mssm.edu)  
ORCID ID 0000-0002-8949-9279

Table OS1. Comparison of the study group to members of the cohort with acceptable spirometries, but without follow up studies, and thus excluded from the study.

| Variable                     | Value                | Included  |         | Excluded  |         | StD <sup>‡</sup> |
|------------------------------|----------------------|-----------|---------|-----------|---------|------------------|
|                              |                      | n or mean | % or SD | n or mean | % or SD |                  |
| n                            |                      | 10,284    | 56.6    | 7,874     | 43.4    |                  |
| Age on 9/11/2001             | years                | 39.7      | 8.7     | 38.1      | 8.9     | 0.20             |
| Sex                          | Male                 | 8,779     | 85.4    | 6,684     | 84.9    | 0.01             |
|                              | Female               | 1,505     | 14.6    | 1,190     | 15.1    |                  |
| Height                       | cm                   | 173.7     | 9.4     | 174.3     | 9.1     | -0.05            |
| Smoking status               | Current Smoker       | 1,434     | 13.9    | 1,128     | 14.3    | 0.01             |
|                              | Former Smoker        | 2,580     | 25.1    | 1,941     | 24.7    |                  |
|                              | Never Smoker         | 6,075     | 59.1    | 4,658     | 59.2    |                  |
|                              | Missing              | 195       | 1.9     | 147       | 1.9     |                  |
| Ethnicity/race               | Non-Latino/ White    | 5,612     | 54.6    | 4,393     | 55.8    | 0.10             |
|                              | Latino               | 3,086     | 30.0    | 1,957     | 24.9    |                  |
|                              | Non-Latino/Other     | 230       | 2.2     | 162       | 2.1     |                  |
|                              | Non-Latino/Black     | 1,289     | 12.5    | 873       | 11.1    |                  |
|                              | Missing              | 67        | 0.7     | 489       | 6.2     |                  |
| BMI category                 | Normal               | 1,484     | 14.4    | 1,069     | 13.6    | 0.08             |
|                              | Overweight           | 4,625     | 45.0    | 3,313     | 42.1    |                  |
|                              | Obese                | 4,175     | 40.6    | 3,492     | 44.4    |                  |
| Cohort entry period          | 2002-2005            | 6,218     | 60.5    | 3,255     | 41.3    | 0.47             |
|                              | 2006-2008            | 2,708     | 26.3    | 2,238     | 28.4    |                  |
|                              | In or after 2009     | 1,358     | 13.2    | 2,381     | 30.2    |                  |
| Pre-WTC occupation group     | Protective           | 4,314     | 42.0    | 3,761     | 47.8    | 0.12             |
|                              | Construction         | 2,716     | 26.4    | 1,772     | 22.5    |                  |
|                              | Other                | 2,193     | 21.3    | 1,587     | 20.2    |                  |
|                              | BCM&IRG <sup>†</sup> | 1,061     | 10.3    | 754       | 9.6     |                  |
| WTC arrival                  | < 48 hr              | 6,338     | 61.6    | 4,943     | 62.8    | -0.03            |
|                              | > 48 hr              | 3,868     | 37.6    | 2,837     | 36.0    |                  |
|                              | Missing              | 78        | 0.76    | 94        | 1.19    |                  |
| WTC exposure duration        | less than 60 days    | 4,897     | 47.6    | 4,070     | 51.7    | 0.09             |
|                              | ≥ 60 days            | 5,321     | 51.7    | 3,720     | 47.2    |                  |
|                              | Missing              | 66        | 0.6     | 84        | 1.1     |                  |
| BDRany*                      | Yes                  | 1,537     | 15.0    | 718       | 9.1     | 0.16             |
|                              | No                   | 8,121     | 79.0    | 6,056     | 76.9    |                  |
|                              | Missing              | 626       | 6.1     | 1,100     | 14.0    |                  |
| Eosinophil count             | > 300/mcl            | 2,042     | 19.9    | 866       | 11.0    | 0.22             |
|                              | < 300/mcl            | 8,221     | 79.9    | 6,465     | 82.1    |                  |
|                              | Missing              | 21        | 0.20    | 543       | 6.9     |                  |
| Neutrophil count             | > 6,000/mcl          | 2,690     | 26.2    | 1,277     | 16.2    | 0.21             |
|                              | ≤ 6,000/mcl          | 7,573     | 73.6    | 6,054     | 76.9    |                  |
|                              | Missing              | 21        | 0.2     | 543       | 6.9     |                  |
| Probable MetSyn <sup>‡</sup> | 2-4 criteria         | 1,888     | 18.4    | 715       | 9.1     | 0.25             |
|                              | 0-1 criteria         | 8,377     | 81.5    | 6,633     | 84.2    |                  |
|                              | Missing              | 19        | 0.2     | 526       | 6.7     |                  |
| Heart rate                   | ≤ 90 bpm             | 10,002    | 97.3    | 7,203     | 91.5    | 0.15             |
|                              | > 90 bpm             | 254       | 2.5     | 47        | 0.6     |                  |
|                              | Missing              | 28        | 0.3     | 624       | 7.9     |                  |

<sup>†</sup>BCM&IRG: buildings and grounds cleaning and maintenance, and electrical, telecommunications and other installation and repair groups; \*BDRany: bronchodilator response at any visit; <sup>‡</sup>probable metabolic syndrome, based on 4 of 5 criteria (see Methods); <sup>‡</sup>StD: standardized difference

Table OS2. Simple and multiple logistic regression models of low FVC vs. early arrival (within 48 hours) at the WTC disaster site, stratified by sex, in 10,284 study subjects.

| Characteristic                   | value                | OR   | 95%CI      | OR <sub>adj</sub> | 95% CI     |
|----------------------------------|----------------------|------|------------|-------------------|------------|
| Arrival at WTC disaster site/sex | ≤ 48 hours/men       | 1.43 | 1.30, 1.58 | 1.29              | 1.17, 1.43 |
|                                  | ≤ 48 hours/women     | 0.91 | 0.71, 1.18 | 0.92              | 0.71, 1.19 |
|                                  | > 48 hours           | ref  | ref        | ref               | ref        |
| Age on 9/11/2001                 | 5 year unit          | 1.04 | 1.02, 1.07 | 1.10              | 1.07, 1.13 |
| Ethnicity/race                   | Non-Latino/Black     | ref  | ref        | ref               | ref        |
|                                  | Non-Latino/White     | 1.81 | 1.56, 2.10 | 1.74              | 1.50, 2.03 |
|                                  | Latino/any race      | 1.98 | 1.70, 2.31 | 2.71              | 2.30, 3.19 |
|                                  | Non-Latino/Other     | 3.53 | 2.67, 4.67 | 4.39              | 3.23, 5.96 |
| Height                           | 5 cm unit            | 1.17 | 1.15, 1.20 | 1.22              | 1.18, 1.26 |
| BMI category                     | Normal weight        | ref  | ref        | ref               | ref        |
|                                  | Overweight           | 1.45 | 1.30, 1.61 | 1.41              | 1.27, 1.58 |
|                                  | Obese                | 2.51 | 2.24, 2.81 | 2.34              | 2.08, 2.63 |
| Cohort entry period              | 2002-2005            | ref  | ref        | ref               | ref        |
|                                  | 2006-2008            | 1.10 | 1.00, 1.21 | 0.99              | 0.89, 1.09 |
|                                  | 2009+                | 1.34 | 1.19, 1.52 | 1.00              | 0.87, 1.14 |
| Smoking status                   | Never smoker         | ref  | ref        | ref               | ref        |
|                                  | Former smoker        | 1.04 | 0.97, 1.12 | 0.97              | 0.90, 1.05 |
|                                  | Current smoker       | 0.93 | 0.83, 1.03 | 1.06              | 0.95, 1.18 |
| Pre-WTC occupation group         | Construction         | ref  | ref        | ref               | ref        |
|                                  | Other                | 1.22 | 1.08, 1.38 | 1.15              | 1.01, 1.31 |
|                                  | Protective           | 1.38 | 1.24, 1.53 | 1.17              | 1.04, 1.32 |
|                                  | BCM&IRG <sup>†</sup> | 1.28 | 1.10, 1.50 | 1.31              | 1.12, 1.53 |
| WTC exposure duration            | <60 days             | ref  | ref        | ref               | ref        |
|                                  | >60 days             | 1.01 | 0.93, 1.10 | 1.06              | 0.97, 1.16 |
| BDRany*                          | Absent               | ref  | ref        | ref               | ref        |
|                                  | Present              | 1.66 | 1.50, 1.85 | 1.50              | 1.34, 1.68 |
| Probable MetSyn                  | 0-1 criteria         | ref  | ref        | ref               | ref        |
|                                  | 2-4 criteria         | 1.67 | 1.51, 1.84 | 1.32              | 1.19, 1.46 |
| Heart rate                       | ≤ 90 bpm             | ref  | ref        | ref               | ref        |
|                                  | > 90 bpm             | 1.69 | 1.35, 2.13 | 1.35              | 1.06, 1.72 |
| Eosinophil count                 | ≤ 300/mcl            | ref  | ref        | ref               | ref        |
|                                  | > 300/mcl            | 1.01 | 0.91, 1.12 | 0.92              | 0.83, 1.02 |
| Neutrophil count                 | ≤ 6000/mcl           | ref  | ref        | ref               | ref        |
|                                  | > 6000/mcl           | 1.40 | 1.28, 1.53 | 1.27              | 1.16, 1.40 |

<sup>†</sup>BCM&IRG: buildings and grounds cleaning and maintenance, and electrical, telecommunications and other installation and repair groups;

\*BDRany: bronchodilator response at any visit;

<sup>‡</sup>probable metabolic syndrome, based on only 4 criteria (see Methods)
